# Supplementary material for: Polycyclic aromatic hydrocarbons in traditional Chinese medicines: an analytical method based on different medicinal parts, levels, distribution, and sources
Source: Royal Society of Chemistry journal article supplement (doi:10.1039/c6ra24682f), 2017-01-01
Supplement: c6ra24682f1.pdf [file c6ra24682f1.pdf]

## RSC Advances

### Electronic Supplementary Material

#### **Polycyclic aromatic hydrocarbons in traditional Chinese medicines: Analytical method based on different medicinal parts, levels, distribution, and sources**

Bao Yu<sup>1</sup>, Dan Zhang<sup>1</sup>, Li-Hong Tan<sup>1</sup>, Sheng-Ping Zhao<sup>1</sup>, Jian-Wei Wang<sup>1</sup>, Ling Yao<sup>1</sup>,  
Wei-Guo Cao<sup>1,2\*</sup>

<sup>1</sup> College of Traditional Chinese Medicine, Chongqing Medical University,  
Chongqing, China

<sup>2</sup> The Laboratory of Traditional Chinese Medicine, Chongqing Medical University,  
Chongqing, China

\* Corresponding author, E-mail: [cwgzd2001@hotmail.com](mailto:cwgzd2001@hotmail.com).

**Fig. S1** Optimization of eluent for (A) silica gel columns and (B) C<sub>18</sub> columns

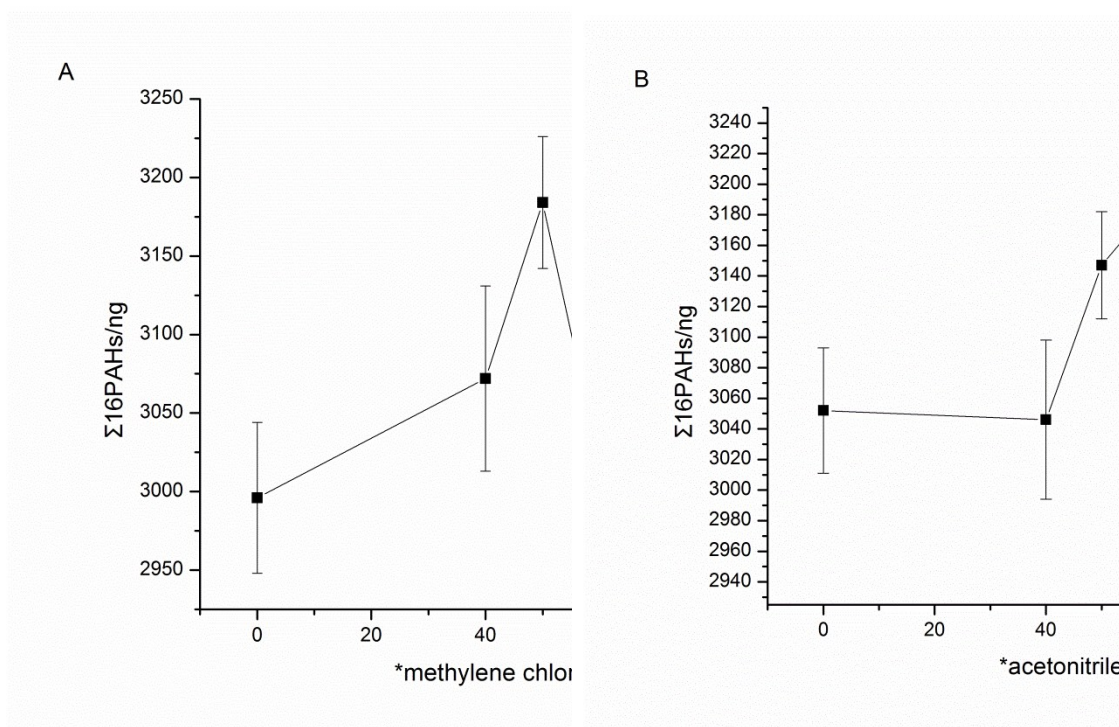

\* methylene chloride ratio =  $V \text{ methylene chloride} / (V \text{ methylene chloride} + V \text{ hexane}) \times 100\%$

\* acetonitrile ratio =  $V \text{ acetonitrile} / (V \text{ acetonitrile} + V \text{ acetone}) \times 100\%$

**Fig. S2** Optimization of eluent volume for (A) silica gel columns and (B) C<sub>18</sub> columns

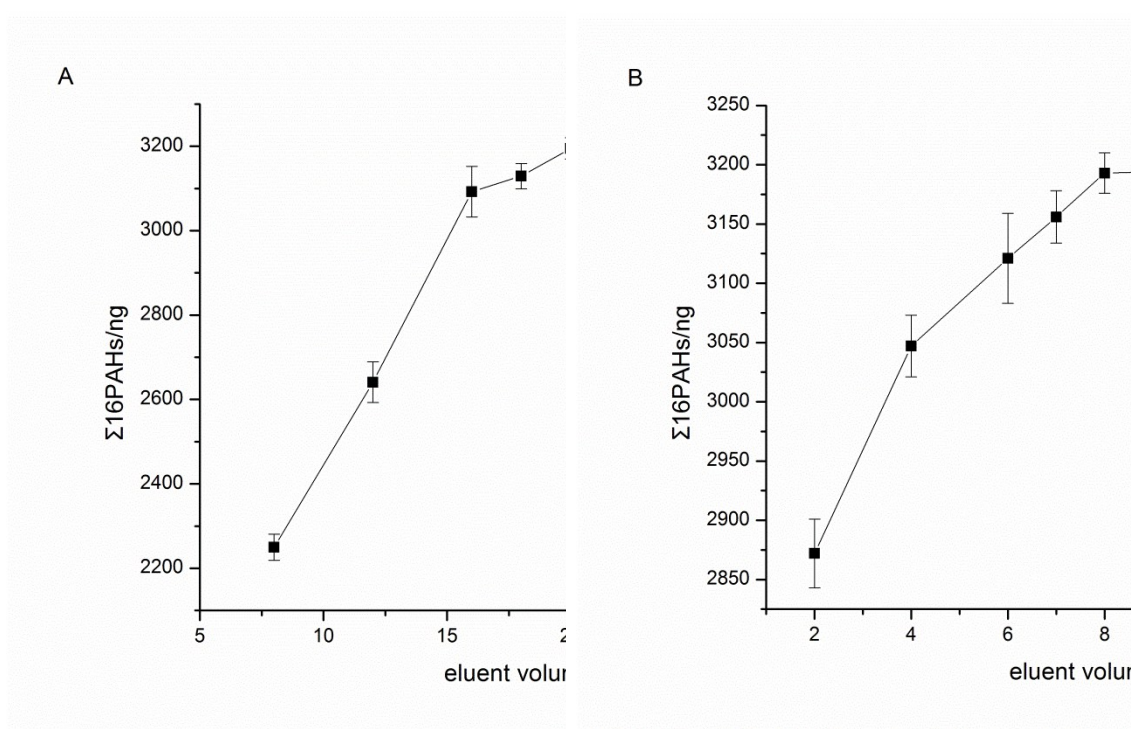

**Fig. S3** Chromatogram of the four representative TCMs samples (A. *Rhizoma dioscoreae*, B. *Mulberry leaves*, C. *Fructus mume*, and D. *Fructus cannabis*) monitored by both (a) UV and (b) fluorescence detection (Peaks identification: 1, NA; 2, ACL; 3, AC; 4, FL; 5, PHE; 6, AN; 7, FA; 8, PY; 9, BaA; 10, CHR; 11, BbFA; 12, BkFA; and 14, IP; the rest of PAHs were not detected in these samples)

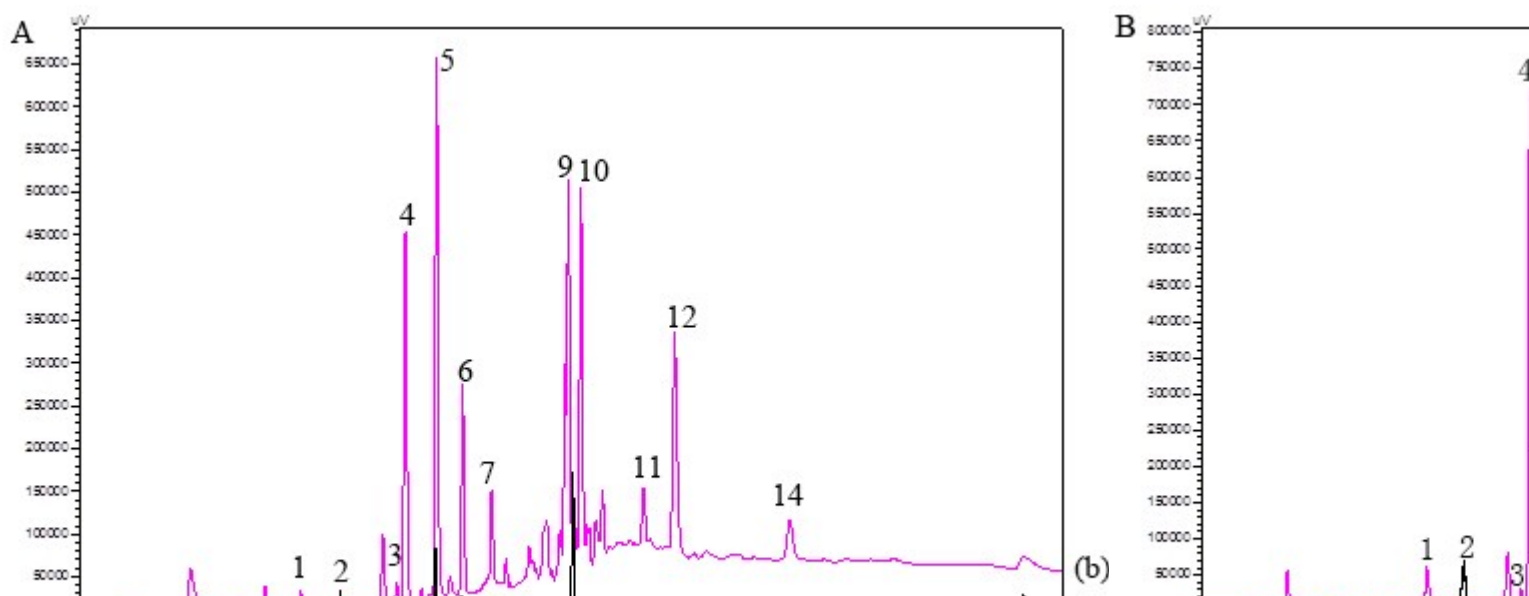

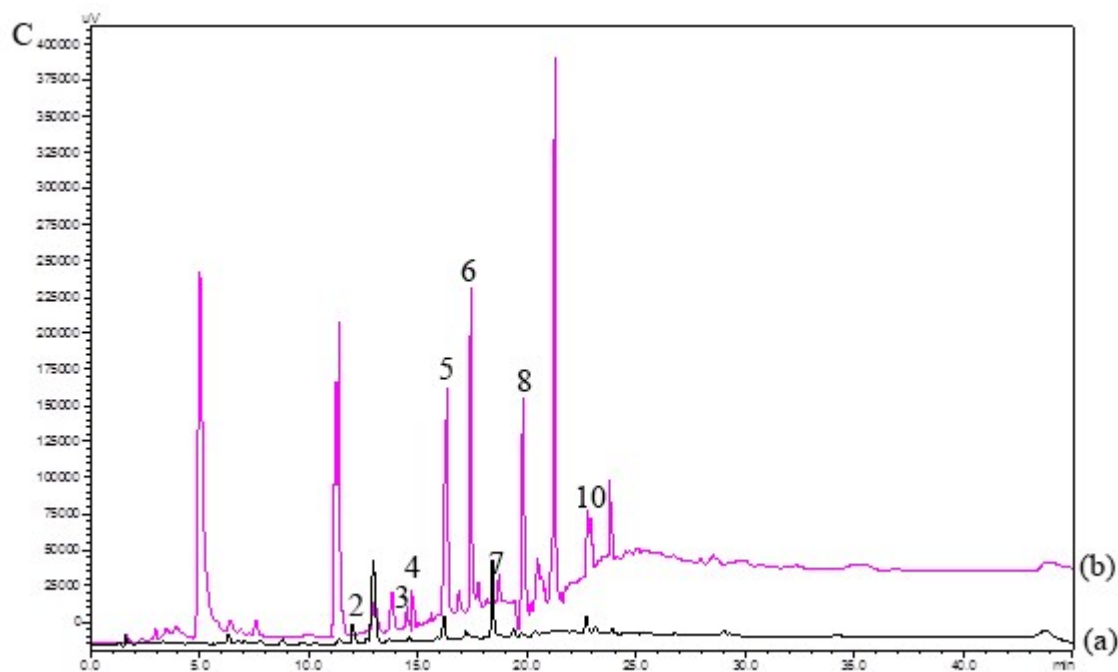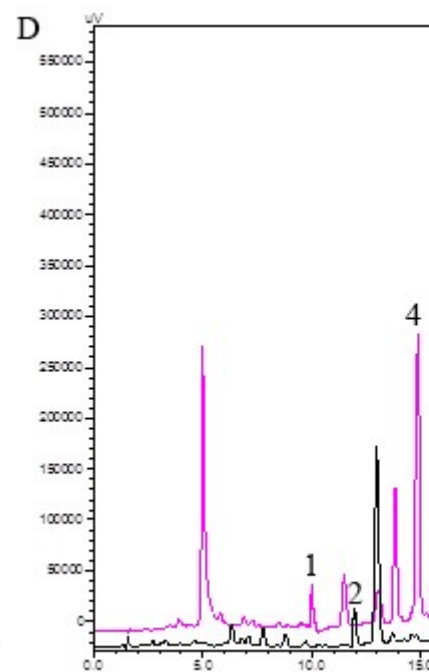

**Table S1** Optimization of extraction methods for four representative samples

| Sample                                         | Ultrasonic                  | Homogenization           | Oscillation                 |
|------------------------------------------------|-----------------------------|--------------------------|-----------------------------|
| <i>Rhizoma dioscoreae</i><br>(Roots and Stems) | 532.1 (4.8) / 82.4<br>(5.7) | 470.4 (3.8) / 78.7 (2.9) | 443.6 (4.8) / 81.6<br>(5.9) |
| <i>Mulberry leaves</i><br>(Leaves and          | 647.5 (6.2) / 74.5<br>(6.0) | 711.8 (6.9) / 83.3 (7.4) | 597.1 (2.5) / 80.8<br>(8.3) |

|                                      |                             |                          |                             |
|--------------------------------------|-----------------------------|--------------------------|-----------------------------|
| Flowers)                             |                             |                          |                             |
| <i>Fructus mume</i><br>(Fruits)      | 83.9 (3.2) / 84.2<br>(5.5)  | 80.5 (1.8) / 82.9 (6.2)  | 96.9 (2.0) / 83.7<br>(8.0)  |
| <i>Fructus cannabidis</i><br>(Seeds) | 240.0 (4.7) / 86.5<br>(6.2) | 200.4 (5.2) / 81.8 (4.9) | 187.6 (3.6) / 86.2<br>(7.1) |

Value was expressed as  $\Sigma$ 16PAHs ( $\mu\text{g}/\text{kg}$ ) / average recoveries (by spiking 50  $\mu\text{g}/\text{kg}$  for each PAH) of 16 PAHs (%).

In brackets were reported the relative standard deviation (%).

**Table S2** Optimization of extraction solvents for four representative samples

| Sample                                         | Hexane                   | Methylene chloride       | Hexane-Methylene chloride (1:1) | Acetonitrile  | Acetone       | Acetonitrile-Acetone (3:2) |
|------------------------------------------------|--------------------------|--------------------------|---------------------------------|---------------|---------------|----------------------------|
| <i>Rhizoma dioscoreae</i><br>(Roots and Stems) | 480.5 (4.8) / 82.2 (3.7) | 532.1 (3.8) / 82.4 (3.0) | 503.3 (5.7) / 79.8 (5.0)        | -/-           | -/-           | -/-                        |
| <i>Mulberry leaves</i><br>(Leaves and Flowers) | 647.4 (6.5) / 82.8 (4.8) | 711.8 (4.7) / 83.3 (5.5) | 688.4 (3.8) / 84.5 (4.4)        | -/-           | -/-           | -/-                        |
| <i>Fructus mume</i><br>(Fruits)                | 96.9 (6.0) / 83.7 (3.2)  | 80.2 (4.3) / 84.1 (7.2)  | 84.4 (2.2) / 81.6 (6.0)         | -/-           | -/-           | -/-                        |
| <i>Fructus cannabidis</i>                      | -/-                      | -/-                      | -/-                             | 212.6 (4.9) / | 193.7 (2.7) / | 240.0 (4.5) / 86.5 (2.0)   |

|                     |  |  |  |               |               |  |
|---------------------|--|--|--|---------------|---------------|--|
| <i>s</i><br>(Seeds) |  |  |  | 79.9<br>(2.5) | 85.5<br>(1.8) |  |
|---------------------|--|--|--|---------------|---------------|--|

Value was expressed as  $\Sigma$ 16PAHs ( $\mu\text{g}/\text{kg}$ ) / average recoveries (by spiking 50  $\mu\text{g}/\text{kg}$  for each PAH) of 16 PAHs (%).

In brackets were reported the relative standard deviation (%).

**Table S3** Optimization of extraction time for four representative samples

| Sample                                         | Ultrasonic                        |                                   |                                   | Homogenization                    |                                   |                                   | Oscillation                      |                                  |                                  |
|------------------------------------------------|-----------------------------------|-----------------------------------|-----------------------------------|-----------------------------------|-----------------------------------|-----------------------------------|----------------------------------|----------------------------------|----------------------------------|
|                                                | 10min                             | 20min                             | 30min                             | 1min                              | 3min                              | 5min                              | 30min                            | 60min                            | 90min                            |
| <i>Rhizoma dioscoreae</i><br>(Roots and Stems) | 489.2<br>(2.8) /<br>79.6<br>(4.9) | 532.1<br>(3.0) /<br>82.4<br>(1.9) | 528.4<br>(2.8) /<br>81.7<br>(4.4) | -/-                               | -/-                               | -/-                               | -/-                              | -/-                              | -/-                              |
| <i>Mulberry leaves</i><br>(Leaves and Flowers) | -/-                               | -/-                               | -/-                               | 676.9<br>(2.8) /<br>81.4<br>(3.1) | 711.8<br>(4.9) /<br>83.3<br>(2.8) | 709.8<br>(7.0) /<br>83.7<br>(5.2) | -/-                              | -/-                              | -/-                              |
| <i>Fructus mume</i><br>(Fruits)                | -/-                               | -/-                               | -/-                               | -/-                               | -/-                               | -/-                               | 82.4<br>(6.3) /<br>79.9<br>(1.8) | 96.9<br>(4.0) /<br>83.7<br>(2.7) | 96.7<br>(3.8) /<br>81.5<br>(4.9) |
| <i>Fructus cannabis</i><br>(Seeds)             | 183.6<br>(6.8) /<br>82.7<br>(2.4) | 240.0<br>(5.2) /<br>86.5<br>(3.3) | 235.7<br>(6.8) /<br>84.9<br>(5.0) | -/-                               | -/-                               | -/-                               | -/-                              | -/-                              | -/-                              |

Value was expressed as  $\Sigma$ 16PAHs ( $\mu\text{g}/\text{kg}$ ) / average recoveries (by spiking 50  $\mu\text{g}/\text{kg}$  for each PAH) of 16 PAHs (%).

In brackets were reported the relative standard deviation (%).

**Table S4** Mean recoveries (%) of selected TCMs by spiking 50 µg/kg of each PAH (*n*=3)

| Sample category    | Name                                | N<br>A                    | A<br>C<br>L           | A<br>C                | FL                    | P<br>H<br>E           | A<br>N                | F<br>A                     | P<br>Y                | B<br>a<br>A                | C<br>H<br>R           | Bb<br>FA              | Bk<br>FA              | Ba<br>P               | IP                    | DB<br>ahA             | Bg<br>hiP             |
|--------------------|-------------------------------------|---------------------------|-----------------------|-----------------------|-----------------------|-----------------------|-----------------------|----------------------------|-----------------------|----------------------------|-----------------------|-----------------------|-----------------------|-----------------------|-----------------------|-----------------------|-----------------------|
| Roots and Stems    | <i>Radix liquiritiae</i>            | 74<br>.0<br>(4<br>.8<br>) | 84<br>.2<br>(2.<br>8) | 73<br>.8<br>(4.<br>8) | 86<br>.5<br>(5.<br>1) | 94<br>.6<br>(3.<br>8) | 83<br>.3<br>(8.<br>1) | 78<br>.5<br>(6.<br>.3<br>) | 81<br>.5<br>(6.<br>3) | 84<br>.7<br>(2.<br>.7<br>) | 89<br>.8<br>(6.<br>9) | 83.<br>7<br>(6.<br>7) | 85.<br>3<br>(5.<br>5) | 93<br>.5<br>(6.<br>5) | 84<br>.4<br>(2.<br>1) | 87.<br>1<br>(5.3<br>) | 84.<br>5<br>(4.<br>8) |
|                    | <i>Radix polygonati officinalis</i> | 69<br>.1<br>(4<br>.1<br>) | 87<br>.3<br>(1.<br>1) | 79<br>.4<br>(9.<br>0) | 78<br>.1<br>(3.<br>9) | 94<br>.8<br>(2.<br>1) | 80<br>.5<br>(3.<br>0) | 89<br>.3<br>(4<br>.9<br>)  | 78<br>.8<br>(5.<br>3) | 92<br>.5<br>(4<br>.7<br>)  | 91<br>.3<br>(5.<br>2) | 81.<br>8<br>(6.<br>4) | 84.<br>8<br>(5.<br>2) | 90<br>.4<br>(6.<br>3) | 86<br>.5<br>(5.<br>8) | 84.<br>9<br>(3.7<br>) | 86.<br>3<br>(5.<br>7) |
|                    | <i>Angelica dahurica</i>            | 72<br>.8<br>(7<br>.9<br>) | 80<br>.1<br>(5.<br>8) | 83<br>.6<br>(7.<br>5) | 89<br>.0<br>(5.<br>0) | 97<br>.5<br>(2.<br>3) | 91<br>.6<br>(4.<br>4) | 90<br>.5<br>(5<br>.0<br>)  | 79<br>.5<br>(4.<br>5) | 83<br>.8<br>(3<br>.8<br>)  | 78<br>.5<br>(3.<br>7) | 90.<br>3<br>(8.<br>4) | 87.<br>0<br>(6.<br>3) | 95<br>.2<br>(5.<br>9) | 93<br>.5<br>(4.<br>1) | 93.<br>3<br>(6.3<br>) | 79.<br>4<br>(5.<br>3) |
|                    | <i>Radix platycodonis</i>           | 71<br>.4<br>(3<br>.2<br>) | 79<br>.8<br>(5.<br>4) | 78<br>.2<br>(7.<br>2) | 78<br>.6<br>(5.<br>2) | 10<br>0<br>(5.<br>3)  | 94<br>.9<br>(1.<br>9) | 94<br>.1<br>(5<br>.2<br>)  | 82<br>.2<br>(4.<br>8) | 88<br>.5<br>(5<br>.2<br>)  | 91<br>.6<br>(3.<br>0) | 85.<br>4<br>(8.<br>0) | 86.<br>5<br>(7.<br>0) | 93<br>.8<br>(6.<br>0) | 90<br>.2<br>(4.<br>4) | 92.<br>8<br>(6.7<br>) | 85.<br>3<br>(4.<br>2) |
|                    | <i>Radix puerariae</i>              | 78<br>.5<br>(3<br>.0<br>) | 73<br>.4<br>(2.<br>9) | 79<br>.0<br>(6.<br>9) | 93<br>.8<br>(6.<br>8) | 10<br>7<br>(5.<br>4)  | 86<br>.5<br>(2.<br>3) | 93<br>.4<br>(3<br>.9<br>)  | 92<br>.4<br>(4.<br>8) | 83<br>.9<br>(5<br>.7<br>)  | 85<br>.4<br>(6.<br>0) | 87.<br>6<br>(7.<br>3) | 84.<br>9<br>(6.<br>9) | 93<br>.8<br>(6.<br>3) | 97<br>.2<br>(7.<br>9) | 88.<br>5<br>(6.7<br>) | 89.<br>7<br>(8.<br>9) |
| Leaves and Flowers | <i>Lophatherum gracile</i>          | 69<br>.6<br>(5<br>.0<br>) | 79<br>.6<br>(6.<br>0) | 85<br>.5<br>(5.<br>2) | 87<br>.2<br>(6.<br>2) | 96<br>.1<br>(4.<br>8) | 93<br>.2<br>(5.<br>0) | 87<br>.0<br>(7<br>.1<br>)  | 93<br>.7<br>(5.<br>8) | 91<br>.0<br>(6<br>.2<br>)  | 86<br>.0<br>(7.<br>9) | 87.<br>9<br>(4.<br>7) | 80.<br>7<br>(6.<br>7) | 86<br>.7<br>(3.<br>4) | 85<br>.8<br>(2.<br>6) | 84.<br>6<br>(6.5<br>) | 82.<br>4<br>(8.<br>5) |

|            |                                   |                           |                       |                       |                            |                       |                            |                           |                            |                           |                       |                        |                       |                            |                       |                       |                       |
|------------|-----------------------------------|---------------------------|-----------------------|-----------------------|----------------------------|-----------------------|----------------------------|---------------------------|----------------------------|---------------------------|-----------------------|------------------------|-----------------------|----------------------------|-----------------------|-----------------------|-----------------------|
|            | <i>Mugwort</i>                    | 74<br>.7<br>(8<br>.1<br>) | 75<br>.0<br>(6.<br>2) | 87<br>.9<br>(5.<br>5) | 90<br>.4<br>(6.<br>1)      | 96<br>.3<br>(4.<br>0) | 87<br>.5<br>(4.<br>8)      | 93<br>.1<br>(7<br>.7<br>) | 10<br>7.<br>8<br>(6.<br>9) | 94<br>.5<br>(6<br>.1<br>) | 85<br>.5<br>(2.<br>0) | 85.<br>0<br>(5.<br>0)  | 92.<br>3<br>(6.<br>4) | 84<br>.2<br>(6.<br>4)      | 86<br>.8<br>(5.<br>8) | 86.<br>2<br>(7.0<br>) | 87.<br>5<br>(9.<br>3) |
|            | <i>Folium<br/>sennae</i>          | 71<br>.8<br>(7<br>.6<br>) | 77<br>.7<br>(5.<br>2) | 78<br>.7<br>(6.<br>0) | 10<br>3.<br>3<br>(5.<br>0) | 88<br>.7<br>(8.<br>6) | 10<br>3.<br>9<br>(4.<br>1) | 86<br>.7<br>(2<br>.2<br>) | 89<br>.8<br>(3.<br>8)      | 92<br>.5<br>(5<br>.7<br>) | 77<br>.6<br>(5.<br>6) | 10<br>0.8<br>(5.<br>1) | 84.<br>7<br>(6.<br>4) | 80<br>.7<br>(7.<br>5)      | 83<br>.0<br>(9.<br>6) | 84.<br>8<br>(6.3<br>) | 92.<br>1<br>(7.<br>9) |
|            | <i>Ginkgo<br/>leaf</i>            | 76<br>.3<br>(7<br>.7<br>) | 82<br>.9<br>(4.<br>7) | 92<br>.3<br>(4.<br>8) | 79<br>.4<br>(5.<br>4)      | 86<br>.3<br>(5.<br>9) | 99<br>.7<br>(4.<br>0)      | 78<br>.2<br>(6<br>.1<br>) | 93<br>.6<br>(1.<br>2)      | 91<br>.7<br>(5<br>.5<br>) | 86<br>.9<br>(3.<br>1) | 94.<br>5<br>(6.<br>2)  | 87.<br>3<br>(5.<br>7) | 85<br>.9<br>(4.<br>1)      | 74<br>.4<br>(3.<br>2) | 82.<br>9<br>(7.0<br>) | 90.<br>5<br>(7.<br>8) |
|            | <i>Flos<br/>loniceræ</i>          | 80<br>.5<br>(6<br>.0<br>) | 83<br>.5<br>(5.<br>0) | 80<br>.0<br>(3.<br>2) | 85<br>.9<br>(6.<br>6)      | 96<br>.0<br>(4.<br>0) | 98<br>.6<br>(2.<br>3)      | 88<br>.5<br>(5<br>.1<br>) | 82<br>.2<br>(1.<br>9)      | 80<br>.4<br>(4<br>.3<br>) | 86<br>.7<br>(6.<br>0) | 92.<br>5<br>(6.<br>5)  | 85.<br>6<br>(4.<br>5) | 90<br>.6<br>(2.<br>9)      | 78<br>.5<br>(6.<br>0) | 84.<br>5<br>(6.7<br>) | 88.<br>7<br>(6.<br>4) |
|            | <i>Flos<br/>chrysanth<br/>emi</i> | 76<br>.3<br>(3<br>.2<br>) | 78<br>.8<br>(2.<br>7) | 77<br>.3<br>(3.<br>0) | 97<br>.2<br>(7.<br>9)      | 83<br>.3<br>(2.<br>1) | 99<br>.5<br>(4.<br>7)      | 91<br>.1<br>(6<br>.3<br>) | 91<br>.4<br>(1.<br>1)      | 92<br>.4<br>(6<br>.0<br>) | 81<br>.6<br>(8.<br>0) | 85.<br>3<br>(6.<br>2)  | 87.<br>7<br>(9.<br>8) | 89<br>.0<br>(5.<br>8)      | 83<br>.5<br>(6.<br>1) | 85.<br>7<br>(5.5<br>) | 92.<br>7<br>(7.<br>6) |
|            | <i>Flos<br/>sophoræ</i>           | 79<br>.2<br>(2<br>.0<br>) | 82<br>.0<br>(3.<br>7) | 85<br>.9<br>(7.<br>5) | 75<br>.2<br>(2.<br>9)      | 74<br>.7<br>(4.<br>9) | 86<br>.9<br>(6.<br>4)      | 83<br>.6<br>(7<br>.7<br>) | 87<br>.3<br>(5.<br>5)      | 92<br>.8<br>(4<br>.8<br>) | 88<br>.1<br>(1.<br>6) | 93.<br>1<br>(4.<br>9)  | 89.<br>0<br>(5.<br>0) | 10<br>7.<br>3<br>(6.<br>0) | 93<br>.0<br>(7.<br>2) | 86.<br>0<br>(4.0<br>) | 93.<br>5<br>(2.<br>6) |
|            | <i>Flos citri<br/>aurantii</i>    | 78<br>.9<br>(6<br>.0<br>) | 80<br>.6<br>(6.<br>1) | 86<br>.6<br>(7.<br>0) | 85<br>.0<br>(4.<br>4)      | 78<br>.5<br>(7.<br>0) | 93<br>.6<br>(6.<br>0)      | 85<br>.8<br>(3<br>.6<br>) | 88<br>.9<br>(3.<br>0)      | 85<br>.1<br>(5<br>.1<br>) | 99<br>.4<br>(1.<br>8) | 83.<br>2<br>(2.<br>1)  | 92.<br>5<br>(2.<br>3) | 10<br>0.<br>4<br>(6.<br>2) | 95<br>.3<br>(6.<br>4) | 79.<br>7<br>(4.3<br>) | 88.<br>7<br>(6.<br>7) |
|            | <i>Flos<br/>lablab<br/>album</i>  | 74<br>.8<br>(6<br>.5<br>) | 85<br>.8<br>(4.<br>8) | 89<br>.2<br>(7.<br>7) | 10<br>6.<br>5<br>(4.<br>2) | 84<br>.0<br>(6.<br>5) | 86<br>.9<br>(9.<br>0)      | 93<br>.0<br>(3<br>.7<br>) | 78<br>.0<br>(5.<br>4)      | 72<br>.8<br>(2<br>.5<br>) | 90<br>.5<br>(1.<br>7) | 81.<br>7<br>(4.<br>5)  | 87.<br>9<br>(5.<br>3) | 84<br>.0<br>(6.<br>2)      | 88<br>.8<br>(5.<br>8) | 74.<br>0<br>(4.8<br>) | 84.<br>9<br>(6.<br>0) |
| Frui<br>ts | <i>Fructus<br/>crataegi</i>       | 75<br>.7<br>(6<br>.5<br>) | 82<br>.5<br>(5.<br>9) | 80<br>.4<br>(7.<br>2) | 92<br>.9<br>(2.<br>5)      | 94<br>.7<br>(3.<br>8) | 82<br>.1<br>(6.<br>1)      | 86<br>.6<br>(4<br>.6<br>) | 84<br>.0<br>(5.<br>4)      | 90<br>.6<br>(5<br>.4<br>) | 78<br>.5<br>(2.<br>0) | 95.<br>3<br>(5.<br>7)  | 93.<br>4<br>(6.<br>0) | 90<br>.5<br>(6.<br>2)      | 86<br>.0<br>(6.<br>0) | 95.<br>4<br>(4.2<br>) | 83.<br>3<br>(6.<br>3) |



|       |                                       |            |            |            |            |            |            |            |            |            |            |            |            |            |            |            |            |
|-------|---------------------------------------|------------|------------|------------|------------|------------|------------|------------|------------|------------|------------|------------|------------|------------|------------|------------|------------|
|       | )                                     |            |            |            |            |            | )          |            | )          |            |            |            |            |            |            |            |            |
|       | <i>Fructus chaenomelis lagenariae</i> | 74.6 (6.2) | 79.6 (5.2) | 10.0 (6.8) | 84.4 (1.9) | 86.9 (3.0) | 93.7 (5.8) | 87.3 (5.3) | 82.0 (5.4) | 84.9 (5.1) | 93.1 (2.1) | 87.8 (6.2) | 89.5 (7.9) | 87.7 (4.6) | 86.7 (4.1) | 87.0 (4.2) | 76.6 (5.8) |
|       | <i>Citrus chirocarpus</i>             | 82.5 (4.8) | 78.4 (4.8) | 10.2 (4.7) | 79.6 (3.3) | 82.2 (4.6) | 84.5 (5.9) | 92.9 (5.0) | 78.3 (6.0) | 82.9 (7.2) | 80.5 (6.6) | 87.3 (7.3) | 90.0 (7.2) | 95.0 (3.8) | 89.7 (5.9) | 89.3 (5.0) | 85.0 (5.5) |
|       | <i>Fructus jujubae</i>                | 78.5 (4.1) | 72.5 (4.8) | 85.1 (3.9) | 90.6 (2.9) | 91.7 (8.7) | 92.8 (4.0) | 86.5 (6.8) | 82.9 (4.5) | 81.3 (7.1) | 92.0 (7.0) | 91.0 (6.5) | 85.9 (6.4) | 86.6 (3.7) | 85.3 (6.0) | 95.5 (6.1) | 84.7 (6.0) |
|       | <i>Fructus rubi</i>                   | 78.4 (3.9) | 78.0 (6.0) | 91.2 (4.0) | 92.8 (5.4) | 85.9 (7.0) | 10.1 (2.2) | 82.6 (6.6) | 84.0 (3.6) | 87.4 (7.1) | 82.8 (7.2) | 83.8 (6.0) | 84.0 (7.8) | 82.6 (6.8) | 93.8 (6.2) | 82.4 (6.0) | 85.1 (7.4) |
|       | <i>Fructus momordicae</i>             | 77.6 (2.6) | 10.3 (6.2) | 76.2 (3.3) | 94.5 (5.0) | 83.0 (7.5) | 84.9 (1.5) | 83.3 (4.8) | 92.4 (3.9) | 91.2 (6.2) | 93.7 (6.6) | 81.6 (6.1) | 94.2 (6.7) | 86.4 (1.1) | 92.2 (6.2) | 91.1 (7.9) | 89.4 (5.4) |
|       | <i>Fructus schisandra chinensis</i>   | 75.9 (1.2) | 75.0 (6.4) | 10.3 (7.0) | 91.0 (3.8) | 96.3 (6.9) | 78.8 (1.9) | 77.3 (5.0) | 87.5 (2.2) | 91.5 (6.2) | 86.6 (6.3) | 84.1 (5.2) | 95.1 (6.2) | 92.5 (1.7) | 89.8 (4.2) | 90.6 (4.2) | 84.8 (4.9) |
| Seeds | <i>Semen pruni</i>                    | 71.4 (4.2) | 79.4 (5.8) | 87.3 (6.7) | 79.3 (5.2) | 97.7 (6.8) | 78.5 (2.8) | 76.4 (5.3) | 90.7 (4.8) | 83.8 (6.0) | 78.6 (6.0) | 78.1 (5.0) | 10.1 (4.7) | 94.6 (3.8) | 91.6 (6.1) | 87.8 (4.3) | 94.0 (2.9) |
|       | <i>Semen armeniacae amarae</i>        | 70.0 (5.1) | 82.9 (6.0) | 93.5 (6.3) | 82.7 (4.1) | 86.4 (7.6) | 76.2 (7.0) | 84.3 (4.5) | 84.3 (3.0) | 82.5 (5.5) | 87.3 (5.9) | 78.8 (3.9) | 92.6 (5.8) | 87.8 (4.8) | 90.9 (4.9) | 88.9 (4.3) | 10.5 (7.5) |
|       | <i>Semen raphani</i>                  | 73.2 (6.6) | 81.3 (6.6) | 86.6 (2.4) | 84.6 (4.4) | 92.7 (7.7) | 79.5 (7.7) | 78.7 (9.1) | 97.4 (1.3) | 86.1 (3.4) | 90.0 (4.2) | 82.1 (2.5) | 95.8 (5.5) | 99.6 (5.4) | 10.1 (4.4) | 94.3 (4.3) | 10.4 (4.4) |

|                         |                           |                       |                       |                       |                       |                            |                           |                       |                           |                       |                       |                       |                       |                            |                       |                       |
|-------------------------|---------------------------|-----------------------|-----------------------|-----------------------|-----------------------|----------------------------|---------------------------|-----------------------|---------------------------|-----------------------|-----------------------|-----------------------|-----------------------|----------------------------|-----------------------|-----------------------|
|                         | .6<br>)                   | 0)                    | 8)                    | 4)                    | 8)                    | 5)                         | .9<br>)                   | 5)                    | .3<br>)                   | 3)                    | 8)                    | 3)                    | 3)                    | (8.<br>7)                  | )                     | 2)                    |
| <i>Sesame seed</i>      | 72<br>.5<br>(7<br>.4<br>) | 84<br>.2<br>(6.<br>5) | 90<br>.7<br>(4.<br>9) | 86<br>.0<br>(1.<br>8) | 85<br>.5<br>(2.<br>8) | 84<br>.8<br>(6.<br>1)      | 83<br>.9<br>(1<br>.2<br>) | 89<br>.2<br>(8.<br>8) | 89<br>.4<br>(5<br>.2<br>) | 84<br>.3<br>(6.<br>9) | 94.<br>2<br>(5.<br>5) | 87.<br>3<br>(6.<br>0) | 94<br>.7<br>(3.<br>8) | 96<br>.5<br>(8.<br>1)      | 87.<br>3<br>(5.5<br>) | 91.<br>5<br>(5.<br>2) |
| <i>Fructus perillae</i> | 74<br>.0<br>(3<br>.9<br>) | 78<br>.4<br>(6.<br>0) | 88<br>.1<br>(6.<br>0) | 70<br>.4<br>(9.<br>8) | 95<br>.1<br>(4.<br>7) | 92<br>.7<br>(6.<br>7)      | 92<br>.2<br>(1<br>.1<br>) | 90<br>.1<br>(7.<br>0) | 84<br>.1<br>(7<br>.4<br>) | 79<br>.7<br>(5.<br>3) | 91.<br>3<br>(5.<br>1) | 89.<br>6<br>(6.<br>1) | 90<br>.6<br>(9.<br>2) | 10<br>8.<br>2<br>(2.<br>3) | 93.<br>5<br>(2.6<br>) | 84.<br>4<br>(7.<br>1) |
| <i>Nutmeg</i>           | 77<br>.8<br>(3<br>.8<br>) | 78<br>.6<br>(5.<br>9) | 96<br>.0<br>(6.<br>2) | 88<br>.5<br>(1.<br>6) | 93<br>.9<br>(5.<br>4) | 10<br>1.<br>5<br>(6.<br>5) | 85<br>.9<br>(4<br>.8<br>) | 95<br>.8<br>(6.<br>9) | 92<br>.7<br>(3<br>.7<br>) | 83<br>.5<br>(2.<br>2) | 84.<br>5<br>(5.<br>3) | 91.<br>5<br>(5.<br>5) | 87<br>.0<br>(4.<br>8) | 94<br>.8<br>(4.<br>7)      | 93.<br>8<br>(2.2<br>) | 89.<br>3<br>(4.<br>9) |
| <i>Semen persicae</i>   | 83<br>.0<br>(8<br>.2<br>) | 80<br>.2<br>(5.<br>4) | 89<br>.2<br>(6.<br>2) | 99<br>.0<br>(3.<br>5) | 92<br>.8<br>(6.<br>0) | 88<br>.1<br>(5.<br>0)      | 91<br>.7<br>(2<br>.2<br>) | 94<br>.7<br>(5.<br>5) | 81<br>.5<br>(5<br>.9<br>) | 93<br>.2<br>(6.<br>5) | 90.<br>9<br>(4.<br>6) | 92.<br>0<br>(4.<br>8) | 95<br>.9<br>(1.<br>7) | 89<br>.2<br>(6.<br>6)      | 87.<br>0<br>(3.6<br>) | 89.<br>8<br>(7.<br>9) |

In brackets were reported the relative standard deviation (%).

**Table S5** PAHs contents in selected TCMs

| Sample category       | Name                                  | PAH content (mean values ± standard deviation, n=3, µg/kg) |              |              |              |              |              |              |                 |            |            |            |            |            |            |           |           |                      |
|-----------------------|---------------------------------------|------------------------------------------------------------|--------------|--------------|--------------|--------------|--------------|--------------|-----------------|------------|------------|------------|------------|------------|------------|-----------|-----------|----------------------|
|                       |                                       | NA                                                         | ACL          | AC           | FL           | PHE          | AN           | FA           | PY              | BaA        | CHR        | BbFA       | BkFA       | BaP        | IP         | DBahA     | BghiP     | Σ16PAHs <sup>b</sup> |
| Roots and<br>Stems    | <i>Rhizoma dioscoreae</i>             | 43.5 ± 7.7                                                 | 62.9 ± 10.1  | 35.4 ± 5.1   | 98.5 ± 16.6  | 145.4 ± 19.2 | 33.2 ± 3.8   | 41.5 ± 3.7   | nd <sup>a</sup> | 26.0 ± 3.3 | 20.0 ± 1.1 | 2.5 ± 0.8  | 3.9 ± 0.1  | nd         | 19.3 ± 2.6 | nd        | nd        | 532.1 ± 64.5         |
|                       | <i>Radix liquiritiae</i>              | 79.8 ± 12.3                                                | 169.8 ± 20.3 | 121.6 ± 42.8 | 167.2 ± 37.4 | 586.4 ± 77.3 | 134.4 ± 16.7 | 146.9 ± 27.4 | 82.2 ± 7.9      | 9.9 ± 0.5  | 6.8 ± 0.5  | 23.6 ± 3.5 | 10.6 ± 0.6 | 24.5 ± 4.5 | 42.7 ± 4.0 | 2.9 ± 0.1 | 4.8 ± 0.5 | 1614.1 ± 147.3       |
|                       | <i>Radix polygonati officinalis</i>   | nd                                                         | 61.6 ± 9.6   | 25.7 ± 6.1   | 74.8 ± 13.3  | 94.2 ± 12.9  | 20.3 ± 1.5   | 57.3 ± 5.5   | 48.0 ± 4.5      | 4.8 ± 0.2  | 4.5 ± 1.0  | 4.1 ± 0.2  | 5.5 ± 1.3  | nd         | 9.4 ± 0.5  | nd        | nd        | 410.2 ± 44.2         |
|                       | <i>Angelica dahurica</i>              | 132.4 ± 16.8                                               | 13.3 ± 0.7   | 18.8 ± 1.5   | 15.9 ± 3.2   | 53.5 ± 4.7   | 22.1 ± 3.5   | 14.3 ± 1.0   | 8.8 ± 0.7       | 2.3 ± 0.7  | 1.2 ± 0.3  | 8.2 ± 0.7  | nd         | 32.8 ± 2.8 | nd         | nd        | nd        | 323.6 ± 29.7         |
|                       | <i>Radix platycodonis</i>             | 22.1 ± 2.0                                                 | 42.5 ± 6.9   | 19.2 ± 3.0   | 54.8 ± 7.0   | 157.6 ± 13.7 | 87.5 ± 10.6  | 18.8 ± 1.7   | 14.6 ± 1.5      | 14.5 ± 1.1 | 26.2 ± 2.9 | 10.6 ± 1.6 | 4.9 ± 0.2  | 13.2 ± 3.0 | 15.0 ± 2.3 | nd        | nd        | 501.5 ± 48.8         |
|                       | <i>Radix puerariae</i>                | 80.2 ± 15.9                                                | 93.5 ± 14.7  | 120.0 ± 37.7 | 26.3 ± 3.3   | 42.9 ± 8.9   | nd           | 13.2 ± 0.8   | 21.3 ± 3.0      | 28.8 ± 3.0 | 24.5 ± 3.0 | 24.1 ± 2.8 | 2.7 ± 0.6  | 31.4 ± 4.8 | 6.9 ± 0.8  | nd        | nd        | 515.8 ± 65.3         |
| Leaves and<br>Flowers | <i>Mulberry leaves</i>                | 110.2 ± 19.0                                               | 119.0 ± 24.4 | 36.9 ± 4.8   | 201.6 ± 48.5 | 145.4 ± 21.8 | 12.8 ± 2.5   | 27.8 ± 2.2   | 41.5 ± 6.7      | 16.6 ± 1.8 | nd         | nd         | nd         | nd         | nd         | nd        | nd        | 711.8 ± 76.4         |
|                       | <i>Lophatherum gracile</i>            | 6.8 ± 1.3                                                  | 129.4 ± 23.0 | 128.4 ± 24.7 | 171.9 ± 20.0 | 275.3 ± 23.6 | 20.4 ± 3.0   | 34.0 ± 3.7   | 50.3 ± 12.5     | 1.0 ± 0.4  | 8.0 ± 0.7  | nd         | nd         | nd         | nd         | nd        | nd        | 825.5 ± 91.8         |
|                       | <i>Mugwort</i>                        | 127.1 ± 38.6                                               | 115.0 ± 14.8 | 33.5 ± 4.6   | 23.6 ± 3.9   | 322.5 ± 43.1 | 35.6 ± 4.4   | 46.5 ± 4.1   | 2.3 ± 0.4       | 5.4 ± 0.5  | 15.6 ± 1.4 | nd         | nd         | nd         | 5.4 ± 0.8  | 3.2 ± 0.4 | nd        | 735.7 ± 85.5         |
|                       | <i>Folium sennae</i>                  | 78.2 ± 16.6                                                | 127.9 ± 33.5 | 138.8 ± 22.3 | 142.5 ± 30.5 | 198.3 ± 18.6 | 19.4 ± 2.7   | 26.3 ± 3.1   | 49.7 ± 5.5      | 5.2 ± 0.3  | 18.6 ± 0.7 | nd         | nd         | nd         | 3.8 ± 0.4  | nd        | nd        | 808.7 ± 74.6         |
|                       | <i>Ginkgo leaf</i>                    | 194.6 ± 48.5                                               | nd           | 142.2 ± 23.9 | 18.3 ± 3.7   | 242.5 ± 31.5 | 22.6 ± 1.8   | 5.8 ± 1.0    | 6.0 ± 0.4       | 2.6 ± 0.1  | 6.8 ± 0.5  | nd         | nd         | 11.9 ± 1.7 | nd         | nd        | nd        | 653.3 ± 73.3         |
|                       | <i>Flos lonicerae</i>                 | nd                                                         | 42.5 ± 8.8   | 30.0 ± 5.5   | 24.8 ± 1.1   | 66.0 ± 13.4  | 15.3 ± 1.1   | 15.3 ± 0.9   | 22.8 ± 1.8      | 1.2 ± 0.2  | 6.7 ± 0.2  | 14.3 ± 1.8 | nd         | nd         | nd         | nd        | nd        | 238.9 ± 18.9         |
|                       | <i>Flos chrysanthemi</i>              | 63.4 ± 21.4                                                | 48.3 ± 6.3   | nd           | 7.1 ± 0.5    | 39.7 ± 4.8   | 3.0 ± 0.2    | 12.0 ± 0.9   | 12.9 ± 1.4      | 2.8 ± 0.1  | 11.5 ± 1.0 | nd         | nd         | nd         | nd         | nd        | nd        | 200.7 ± 30.1         |
|                       | <i>Flos sophorae</i>                  | 48.4 ± 6.9                                                 | 61.1 ± 10.2  | 45.4 ± 7.1   | 25.0 ± 1.7   | 49.5 ± 6.7   | 2.7 ± 0.3    | 10.5 ± 1.3   | nd              | 2.4 ± 0.2  | 8.0 ± 0.7  | nd         | nd         | nd         | nd         | nd        | nd        | 253.0 ± 24.6         |
|                       | <i>Flos citri aurantii</i>            | nd                                                         | 71.3 ± 9.3   | nd           | 2.2 ± 0.4    | 9.8 ± 0.6    | 2.3 ± 0.1    | 1.2 ± 0.1    | 2.9 ± 0.1       | 3.7 ± 0.8  | 9.6 ± 0.8  | nd         | nd         | 12.2 ± 2.6 | nd         | nd        | nd        | 115.2 ± 10.0         |
|                       | <i>Flos lablab album</i>              | 95.3 ± 18.8                                                | 5.2 ± 1.4    | 81.5 ± 11.0  | 49.7 ± 3.9   | 58.4 ± 7.0   | 15.5 ± 1.4   | 9.0 ± 0.6    | 19.5 ± 1.0      | 3.2 ± 0.7  | 8.5 ± 1.1  | nd         | 12.7 ± 1.8 | nd         | nd         | nd        | nd        | 358.5 ± 28.3         |
| Fruits                | <i>Fructus mume</i>                   | nd                                                         | 3.4 ± 0.6    | 7.1 ± 0.9    | 2.0 ± 0.2    | 43.8 ± 4.1   | 23.3 ± 1.0   | 2.9 ± 0.2    | 12.4 ± 0.9      | nd         | 2.0 ± 0.1  | nd         | nd         | nd         | nd         | nd        | nd        | 96.9 ± 6.6           |
|                       | <i>Fructus crataegi</i>               | 56.4 ± 15.6                                                | 2.5 ± 0.3    | nd           | 14.7 ± 1.2   | 24.0 ± 1.8   | 8.2 ± 0.2    | 6.2 ± 0.5    | 15.0 ± 1.3      | 7.6 ± 0.6  | 18.3 ± 2.2 | nd         | nd         | 10.3 ± 1.9 | nd         | nd        | nd        | 163.2 ± 20.2         |
|                       | <i>Fructus chaenomelis lagenariae</i> | 4.2 ± 1.3                                                  | nd           | 9.6 ± 2.0    | 5.0 ± 0.3    | 14.8 ± 2.2   | 3.8 ± 0.6    | 6.7 ± 0.4    | 17.3 ± 1.4      | 4.8 ± 0.6  | 13.9 ± 1.6 | nd         | 1.5 ± 0.1  | nd         | nd         | nd        | nd        | 81.6 ± 5.8           |
|                       | <i>Citrus chirocarpus</i>             | 126.1 ± 27.5                                               | 18.4 ± 2.0   | 12.3 ± 0.7   | 19.0 ± 3.8   | 47.3 ± 4.0   | 12.4 ± 0.5   | 9.9 ± 1.3    | 10.8 ± 0.8      | 1.3 ± 0.3  | 4.1 ± 0.2  | nd         | nd         | nd         | nd         | nd        | nd        | 261.6 ± 31.0         |
|                       | <i>Fructus jujubae</i>                | 10.3 ± 2.7                                                 | 2.9 ± 0.5    | 5.5 ± 0.3    | 10.4 ± 1.1   | 11.5 ± 2.5   | 4.9 ± 0.2    | 6.5 ± 0.3    | 18.2 ± 1.2      | 5.4 ± 0.4  | 2.3 ± 0.2  | nd         | nd         | 14.6 ± 3.4 | nd         | nd        | nd        | 92.5 ± 3.6           |

|       |                                     |              |             |              |             |             |            |            |            |           |            |           |    |    |            |    |    |              |
|-------|-------------------------------------|--------------|-------------|--------------|-------------|-------------|------------|------------|------------|-----------|------------|-----------|----|----|------------|----|----|--------------|
|       | <i>Fructus rubi</i>                 | 1.5 ± 0.4    | nd          | nd           | 2.3 ± 0.6   | 4.6 ± 0.7   | 1.1 ± 0.1  | nd         | 5.3 ± 0.4  | nd        | 2.0 ± 0.5  | 2.7 ± 0.3 | nd | nd | nd         | nd | nd | 19.5 ± 0.9   |
|       | <i>Fructus momordicae</i>           | 7.7 ± 1.2    | 3.2 ± 0.4   | 6.2 ± 0.3    | 4.5 ± 0.6   | 18.3 ± 1.3  | 8.9 ± 0.9  | 11.4 ± 1.7 | 12.3 ± 1.6 | 3.2 ± 0.2 | 9.3 ± 1.9  | 5.2 ± 0.2 | nd | nd | nd         | nd | nd | 90.2 ± 4.7   |
|       | <i>Fructus schisandra chinensis</i> | 154.9 ± 29.7 | nd          | 137.3 ± 33.1 | 33.9 ± 5.2  | 34.0 ± 4.2  | 4.6 ± 0.8  | 12.1 ± 1.3 | 24.4 ± 3.3 | 1.6 ± 0.2 | 4.9 ± 0.8  | nd        | nd | nd | nd         | nd | nd | 407.7 ± 36.2 |
| Seeds | <i>Fructus cannabis</i>             | 73.0 ± 15.5  | 33.5 ± 5.8  | nd           | 64.2 ± 11.0 | 27.5 ± 1.5  | 22.3 ± 3.5 | 4.2 ± 0.9  | 5.8 ± 0.8  | 2.3 ± 0.1 | 7.2 ± 0.6  | nd        | nd | nd | nd         | nd | nd | 240.0 ± 19.4 |
|       | <i>Semen pruni</i>                  | 51.6 ± 12.0  | 31.1 ± 4.7  | 12.4 ± 1.1   | 35.8 ± 2.7  | 63.4 ± 5.4  | 17.5 ± 1.1 | 6.3 ± 0.3  | 10.4 ± 1.8 | 1.3 ± 0.2 | 5.0 ± 0.8  | nd        | nd | nd | nd         | nd | nd | 234.8 ± 15.5 |
|       | <i>Semen armeniaca amarae</i>       | 67.3 ± 14.2  | 82.9 ± 13.8 | nd           | nd          | 48.5 ± 6.0  | 16.8 ± 1.5 | 14.1 ± 0.9 | 23.5 ± 2.7 | 5.6 ± 0.8 | 15.8 ± 0.9 | 4.7 ± 0.8 | nd | nd | nd         | nd | nd | 279.2 ± 18.1 |
|       | <i>Semen raphani</i>                | nd           | 11.3 ± 2.2  | 6.7 ± 0.5    | 6.4 ± 1.1   | 22.9 ± 3.0  | nd         | 8.3 ± 0.8  | 17.4 ± 0.9 | 2.9 ± 0.2 | 11.0 ± 1.0 | nd        | nd | nd | 10.1 ± 1.5 | nd | nd | 97.0 ± 7.4   |
|       | <i>Sesame seed</i>                  | 56.2 ± 10.4  | 54.1 ± 9.1  | 10.0 ± 0.7   | 88.3 ± 15.6 | 68.3 ± 7.4  | 14.4 ± 1.3 | 12.6 ± 1.1 | 21.1 ± 1.8 | 3.5 ± 0.1 | nd         | nd        | nd | nd | nd         | nd | nd | 328.5 ± 21.7 |
|       | <i>Fructus perillae</i>             | 74.1 ± 12.3  | 28.5 ± 1.7  | 6.9 ± 1.4    | 70.0 ± 8.5  | 31.8 ± 3.8  | 12.1 ± 1.7 | 11.8 ± 0.7 | 22.5 ± 3.4 | 5.1 ± 0.4 | 12.4 ± 1.5 | nd        | nd | nd | nd         | nd | nd | 275.2 ± 18.3 |
|       | <i>Nutmeg</i>                       | nd           | 68.5 ± 16.0 | 5.0 ± 0.1    | 28.3 ± 1.6  | 54.9 ± 4.9  | 10.1 ± 2.1 | 14.5 ± 1.2 | 15.3 ± 0.8 | 7.8 ± 0.9 | 18.1 ± 2.0 | nd        | nd | nd | nd         | nd | nd | 222.5 ± 20.5 |
|       | <i>Semen persicae</i>               | 53.5 ± 8.1   | 38.6 ± 4.4  | 19.4 ± 3.2   | 94.0 ± 7.9  | 85.3 ± 10.7 | 6.2 ± 0.8  | 21.6 ± 3.0 | 42.4 ± 4.4 | 2.3 ± 0.2 | 4.8 ± 0.6  | nd        | nd | nd | nd         | nd | nd | 368.1 ± 15.8 |

<sup>a</sup> Not detected.

<sup>b</sup> Total content of all 16 PAHs.
